# Supplementary material for: Synergistic killing of human small cell lung cancer cells by the Bcl-2-inositol 1,4,5-trisphosphate receptor disruptor BIRD-2 and the BH3-mimetic ABT-263
Source: PubMed Central journal article supplement (PMC4720890; doi:10.1038/cddis.2015.355), 2015-12-31
Supplement: cddis2015355x1.pdf [file cddis2015355x1.pdf]

| Cell Line | BIRD-2<br>IC50 (μM) | StDev | Ser<br>IC50 (μM) | StDev | ABT-263<br>IC50 (μM) | StDev |
|-----------|---------------------|-------|------------------|-------|----------------------|-------|
| H2171     | 9                   | 3     | 23               | 2     | 0.05                 | 0.03  |
| H1092     | 9                   | 2     | 32               | 5     | 1                    | 0.1   |
| H2029     | 9                   | 11    | 33               | 15    | 1.5                  | 1.4   |
| H64       | 9                   | 3     | 30               | 6     | 0.17                 | 0.08  |
| H378      | 10                  | 3     | 45               | 3     | >4                   | N/A   |
| DMS79     | 14                  | 8     | 53               | 11    | 2.4                  | 0.6   |
| H1694     | 18                  | 7     | 67               | 1     | 0.11                 | 0.02  |
| H250      | 18                  | 4     | 55               | 6     | 0.37                 | 0.07  |
| H446      | 20                  | 9     | 78               | 4     | 1.5                  | 0.1   |
| DMS454    | 22                  | 6     | 34               | 11    | 0.41                 | 0.1   |
| H82       | 23                  | 4     | 57               | 7     | >4                   | N/A   |
| H526      | 24                  | 2     | 60               | 0     | 7.8                  | 5     |
| H1048     | 33                  | 3     | 75               | 1     | 2.2                  | 0.1   |
| SW1271    | 33                  | 4     | 79               | 11    | 26                   | 7     |
| H1688     | 56                  | 27    | 43               | 1     | 1.6                  | 0.4   |

**Supplementary Table 1. BIRD-2 and ABT-263 sensitivity of SCLC lines**
