# Supplementary material for: Synergistic killing of human small cell lung cancer cells by the Bcl-2-inositol 1,4,5-trisphosphate receptor disruptor BIRD-2 and the BH3-mimetic ABT-263
Source: PubMed Central journal article supplement (PMC4720890; doi:10.1038/cddis.2015.355), 2015-12-31
Supplement: cddis2015355x2.pdf [file cddis2015355x2.pdf]

BCL2 - Entrez ID: 596

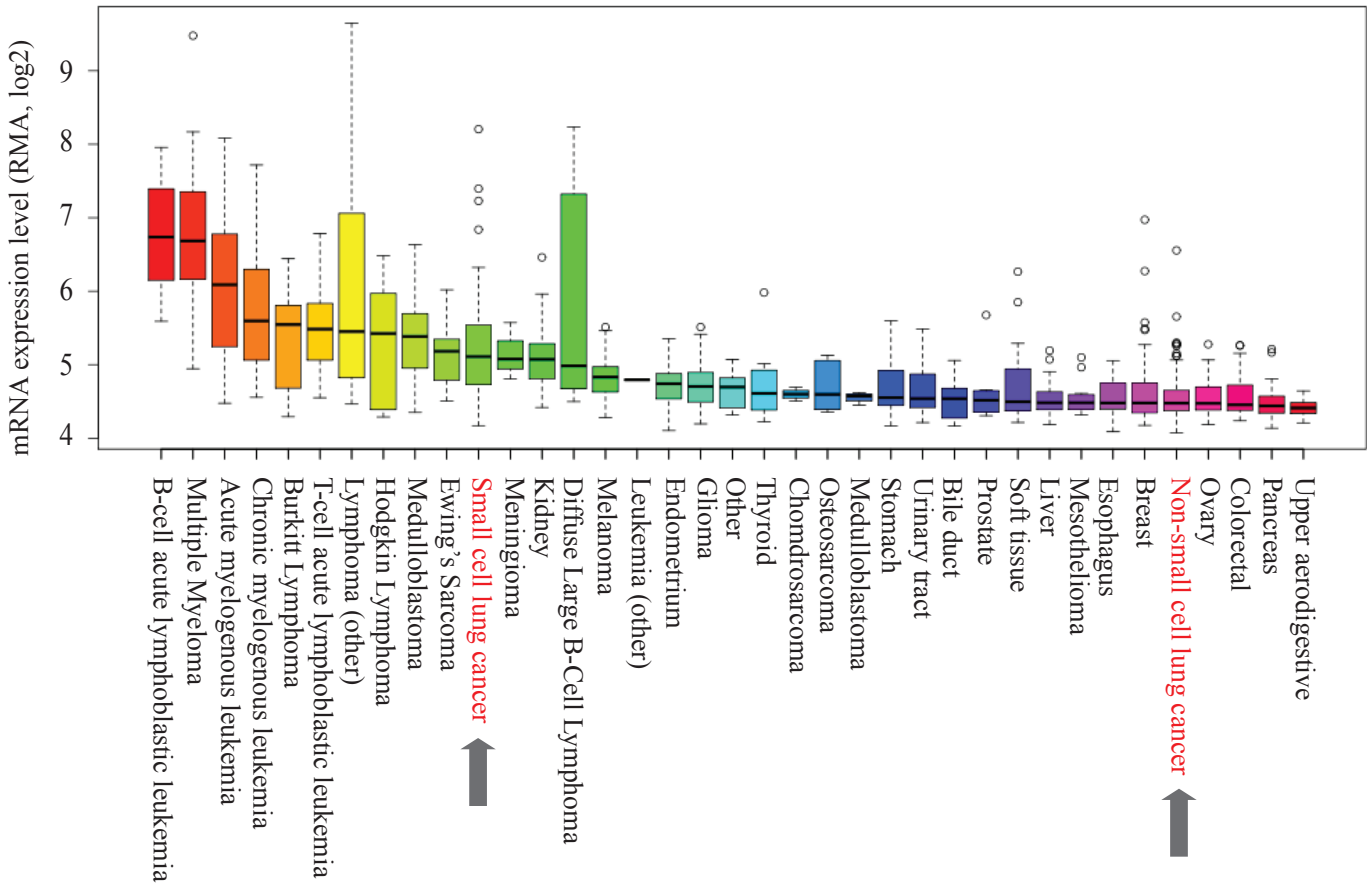

**Supplementary Figure 1. Bcl-2 mRNA levels in malignancies of different cellular origin.** SCLC has a higher Bcl-2 mRNA level than many other solid tumors. This figure is derived from the Broad Institute's Cancer Cell Line Encyclopedia Database: <http://www.broadinstitute.org/ccle/home>. Arrows, SCLC and NSCLC.
