# Supplementary material for: Synergistic killing of human small cell lung cancer cells by the Bcl-2-inositol 1,4,5-trisphosphate receptor disruptor BIRD-2 and the BH3-mimetic ABT-263
Source: PubMed Central journal article supplement (PMC4720890; doi:10.1038/cddis.2015.355), 2015-12-31
Supplement: cddis2015355x3.pdf [file cddis2015355x3.pdf]

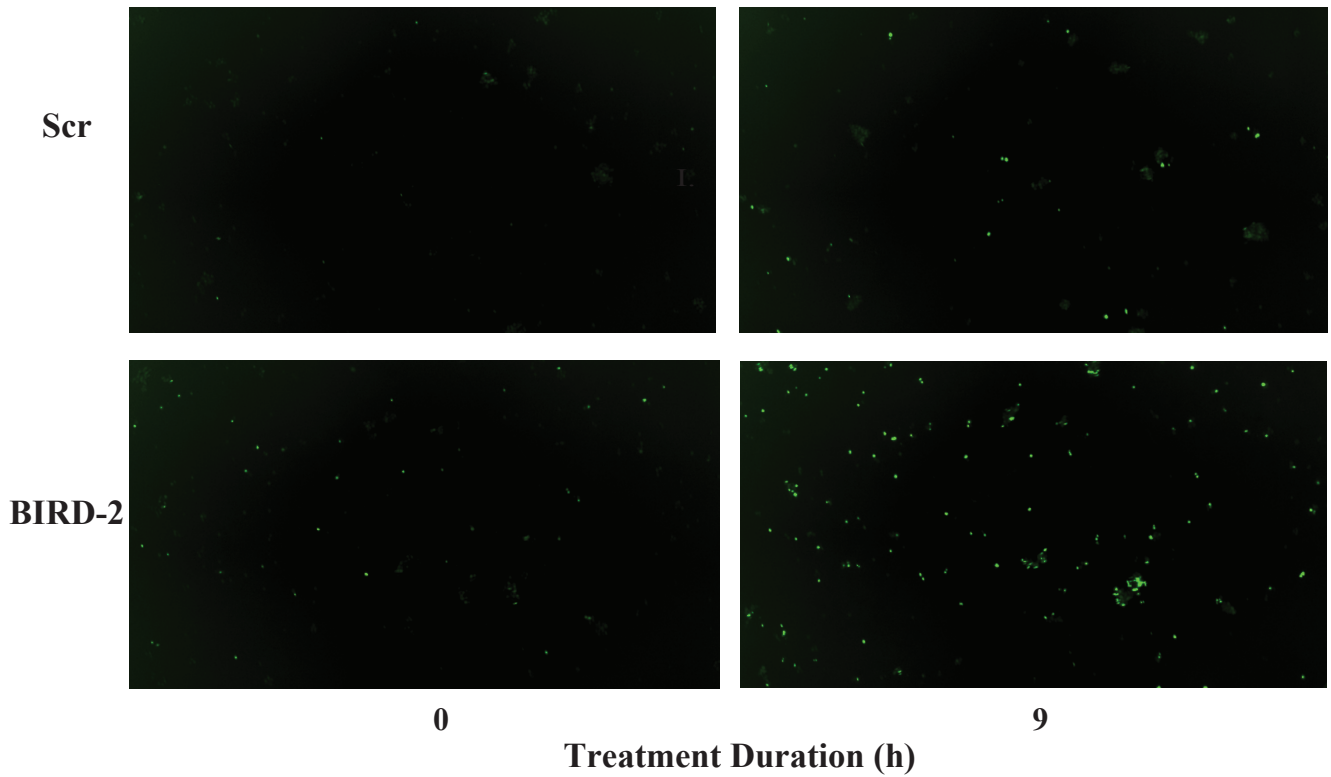

**Supplementary Figure 2: Caspase 3/7 activity in SCLC Cells.** Representative images obtained from the IncuCyte ZOOM, measuring caspase 3/7 activity in H2171 cells treated with 20  $\mu$ M BIRD-2 or Scr control peptide for the indicated times.
