# Supplementary material for: Synergistic killing of human small cell lung cancer cells by the Bcl-2-inositol 1,4,5-trisphosphate receptor disruptor BIRD-2 and the BH3-mimetic ABT-263
Source: PubMed Central journal article supplement (PMC4720890; doi:10.1038/cddis.2015.355), 2015-12-31
Supplement: cddis2015355x4.pdf [file cddis2015355x4.pdf]

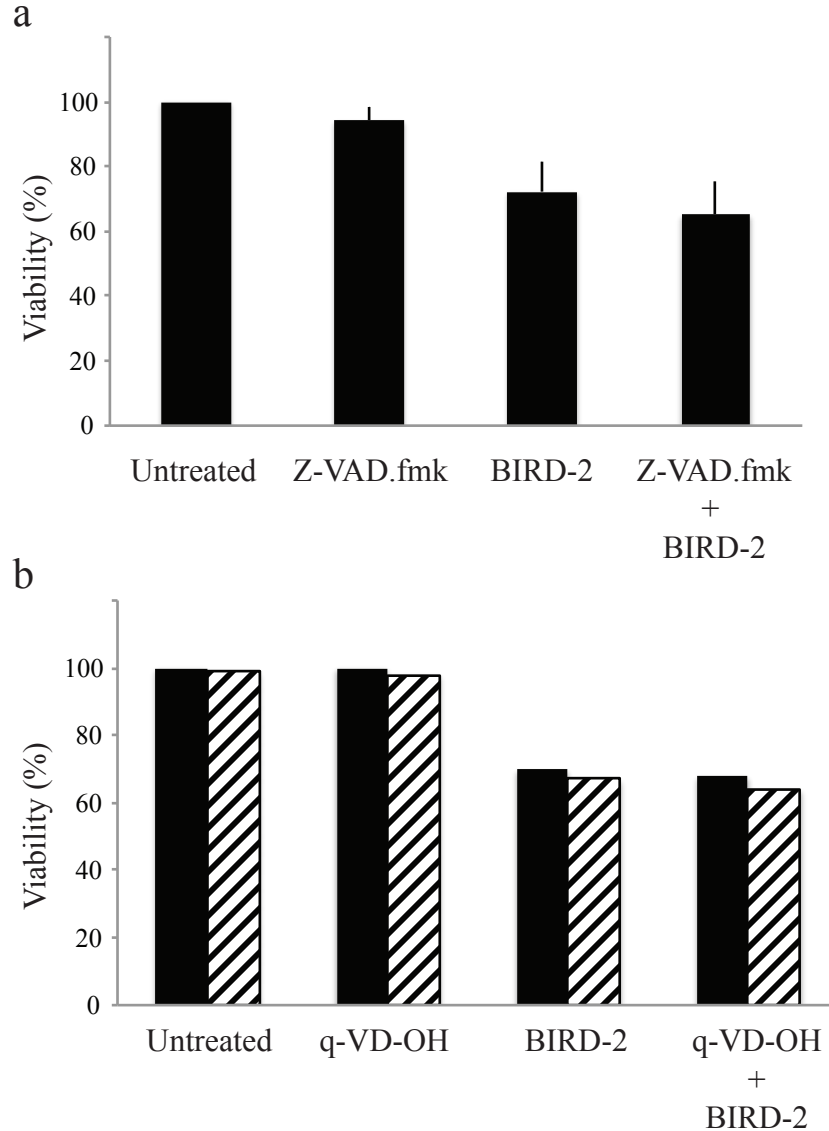

**Supplementary Figure 3. Effect of caspase inhibitors on BIRD-2-induced cell death.**

(a) H2171 SCLC cells were treated for 24 h with 20  $\mu$ M BIRD-2  $\pm$  200  $\mu$ M Z-VAD.fmk.

Cell viability was determined by CTG assay with data normalized to untreated cells. Symbols represent mean  $\pm$  SD (N=4 separate experiments). (b) H2171 SCLC cells were treated for 24 h with 20  $\mu$ M BIRD-2  $\pm$  20  $\mu$ M q-VD-OH. Solid bars represent findings of a single experiment in which cell viability was determined by CTG assay. Cross-hatched bars represent findings of a separate experiment in which cell apoptosis was detected based on morphology of Hoechst-stained nuclei, and viability measurement calculated as percentage of cells with normal nuclear chromatin pattern and absence of apoptotic hallmarks.
